# Supplementary material for: Yield Adjustment Using GPR-Derived Spatial Covariance Structure in Cassava Field: A Preliminary Investigation
Source: MDPI journal article supplement (doi:10.3390/rs15071771), 2023-03-25
Supplement: s1 [file s1]

Archive with 1 entries (1 files):
- remotesensing-2274838-SupplemetaryFile.pdf
