# Supplementary material for: Yield Adjustment Using GPR-Derived Spatial Covariance Structure in Cassava Field: A Preliminary Investigation
Source: MDPI journal article supplement (doi:10.3390/rs15071771), 2023-03-25
Supplement: s1 [file s1 › remotesensing-2274838-SupplemetaryFile.pdf]

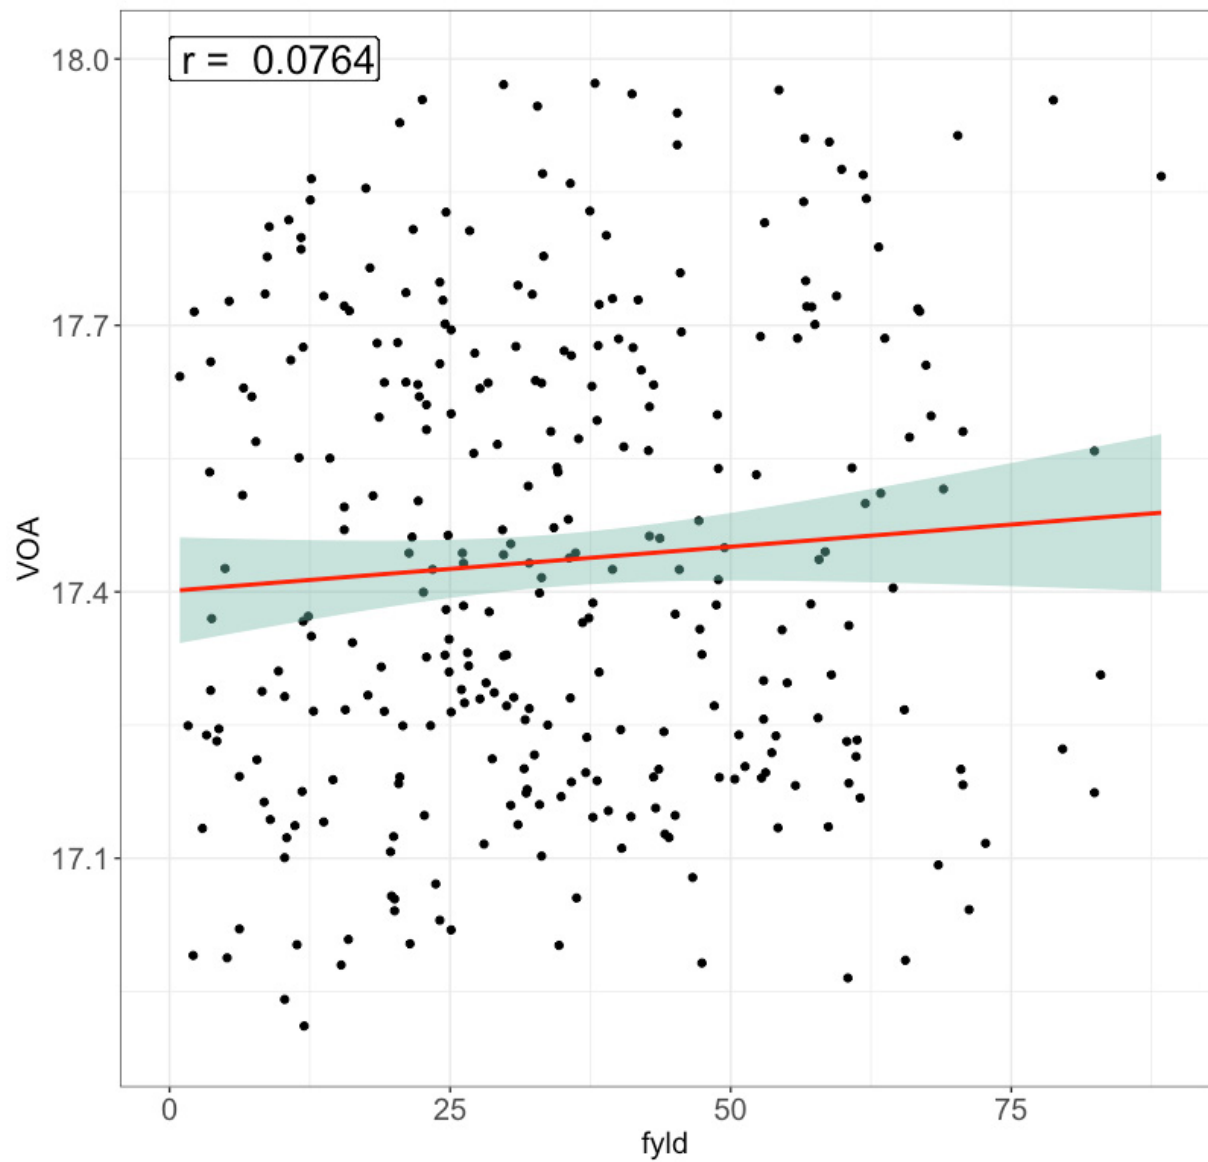

FigureS1. Pearson correlation between VOA and fresh root yield (fyld) from all field plots.

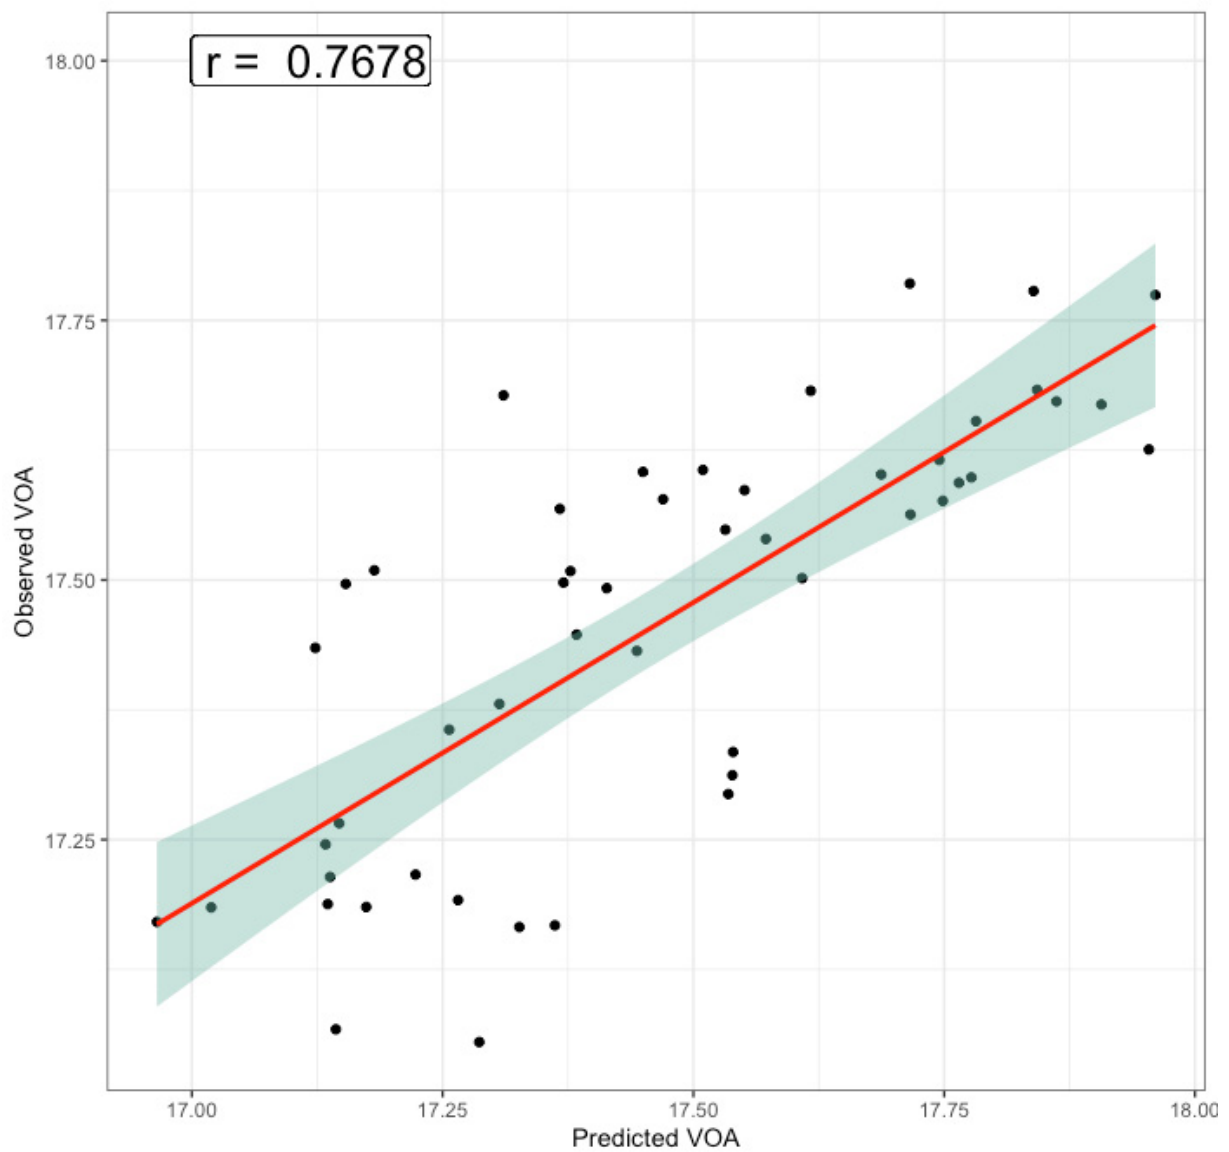

Figure S2. Pearson correlation between observed and predicted VOA based on universal kriging interpolation using leave-one-out-cross validation scheme (50 testing set and 330 training set).
